# Supplementary material for: Transcriptomic analysis of TGFβ-mediated fibrosis in primary human Tenon’s fibroblasts
Source: Research Square preprint supplement (doi:10.21203/rs.3.rs-4008732/v1), 2024-03-21
Supplement: Supplementary file 1 [file e42e0e975432e5d4abee00b2.docx]

**Supplementary Information**

**Transcriptomic analysis of TGFβ-mediated fibrosis in primary human Tenon’s fibroblasts**

**Author information**

Zoe Pasvanis, Antony Boynes, Roy C.K. Kong, Elsa C. Chan, Raymond C.B. Wong, Jennifer Fan Gaskin

**Supplementary tables**


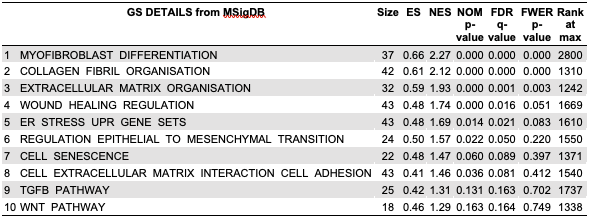


**Supplementary table 1: GSEA table for TGF-B1 treatment compared to control** GSEA enrichment results for the top 10 enrichment terms. ES: enrichment score, NES: normalized enrichment score, NOM p-value: nominal p-value, FDR q-value: false-discovery rate q-value, FWER p-value: familywise-error rate p-value.


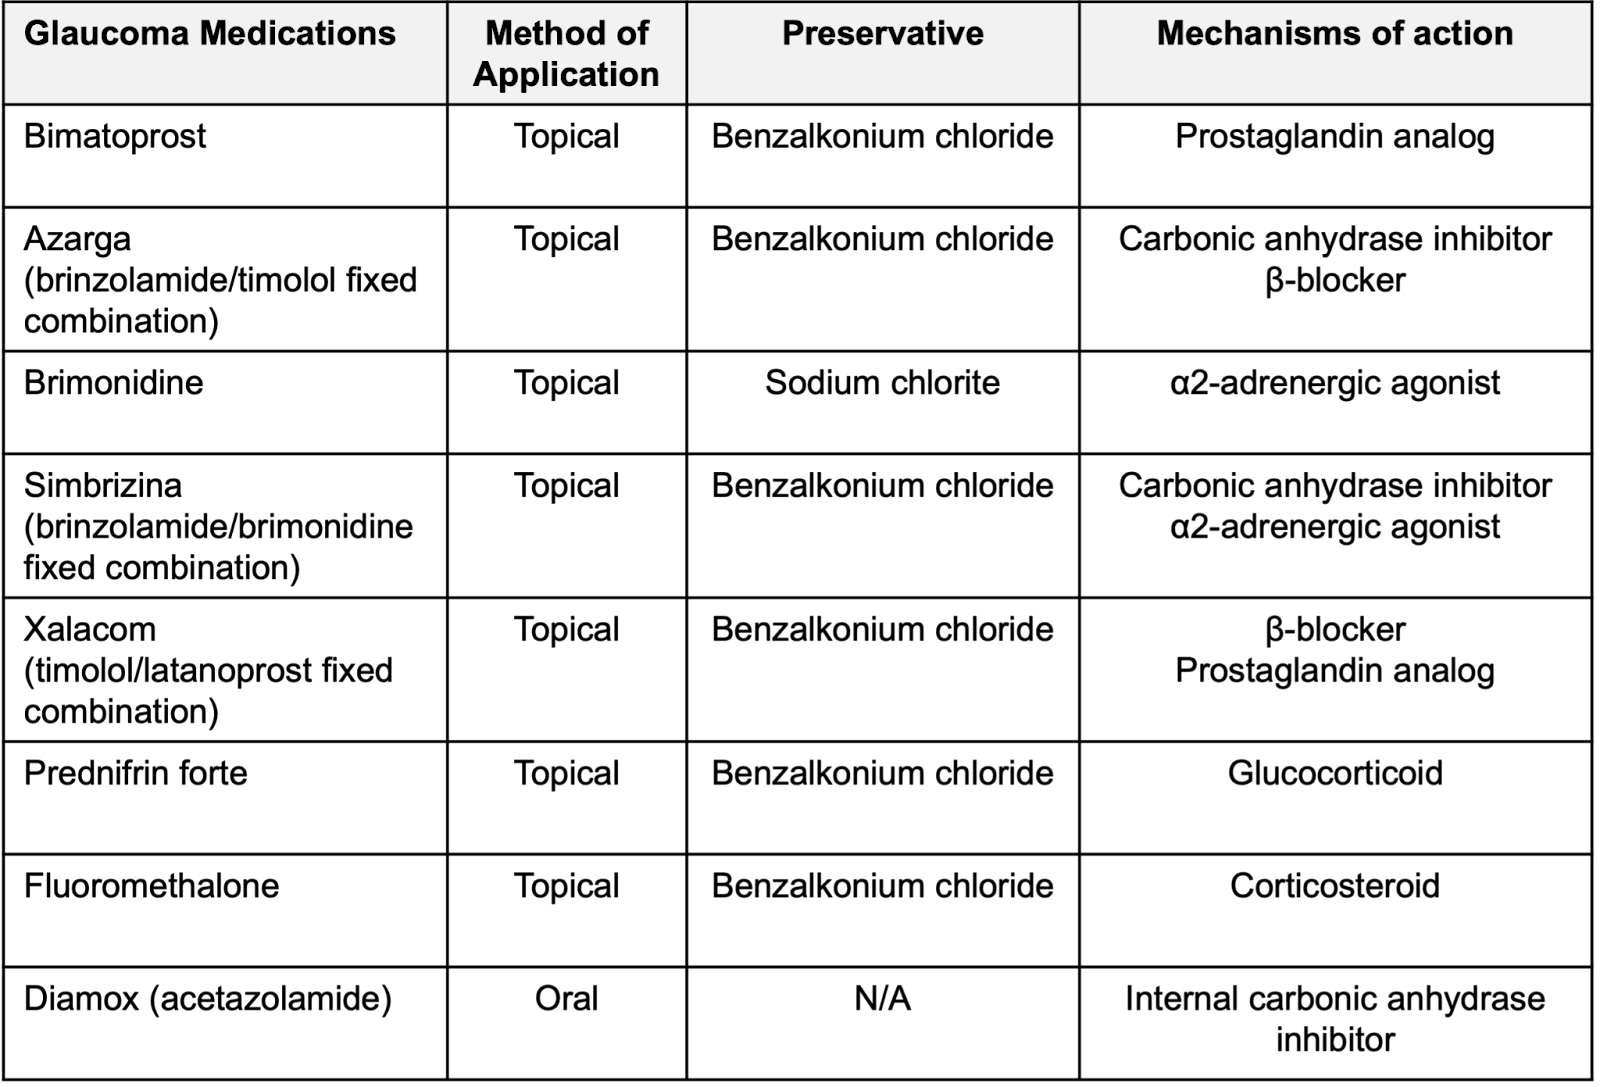


**Supplementary table 2: Prescribed glaucoma medications used by patients.** Glaucoma medications being used by patients at the time of tissue biopsy collection.

**Supplementary figures**


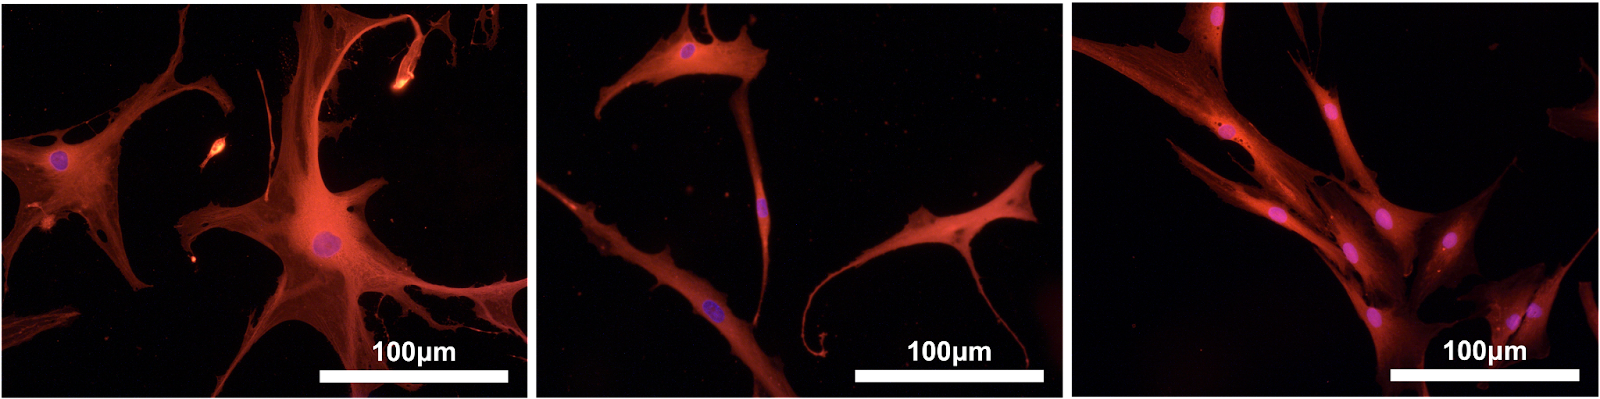


**Supplementary figure 1: Characterisation of Human Tenon’s fibroblasts (HTFs)** Cultured primary HTFs were stained with S100A4 (red) and nuclei counterstained with DAPI (blue). Fibroblast phenotype verified by cells presenting red-stained cytoplasm. (N=3)


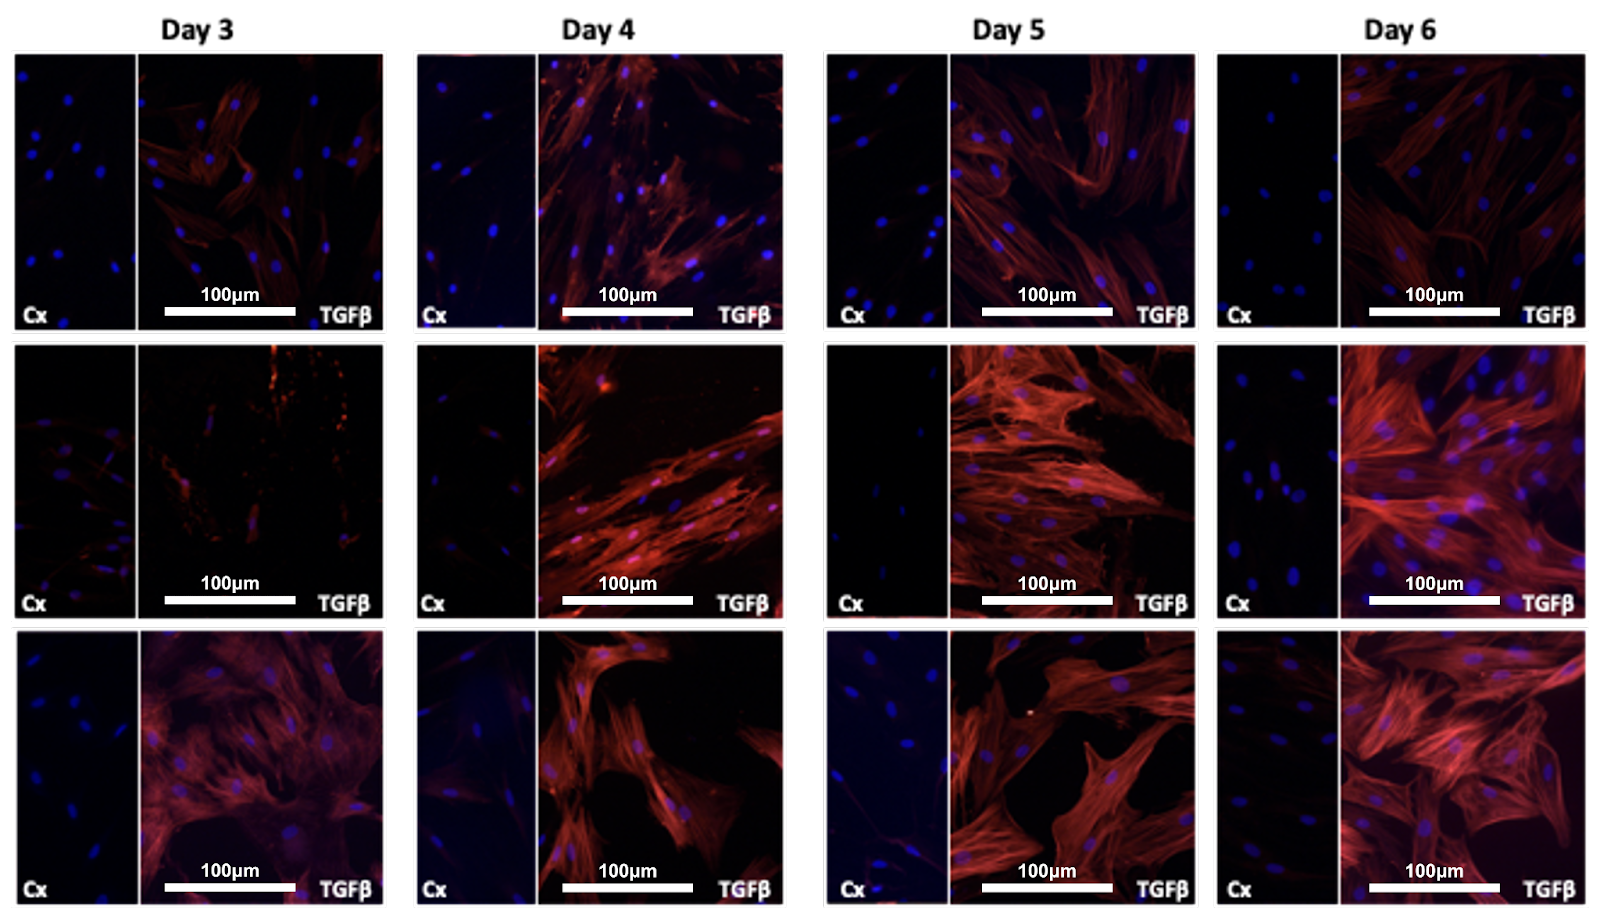


**Supplementary figure 2: Time-Point Study Triplicate Phenotypic Imaging of HTFs after 3-5 days of TGFβ Treatment** Cultured primary HTFs were stained with αSMA-antibody and nuclei counterstained with DAPI (blue). Red-stained fibres indicate de novo expression of αSMA in collagen stress fibres of myofibroblasts. Cx= Control sample; TGFβ = Transforming Growth Factor Beta treated sample (N=3)


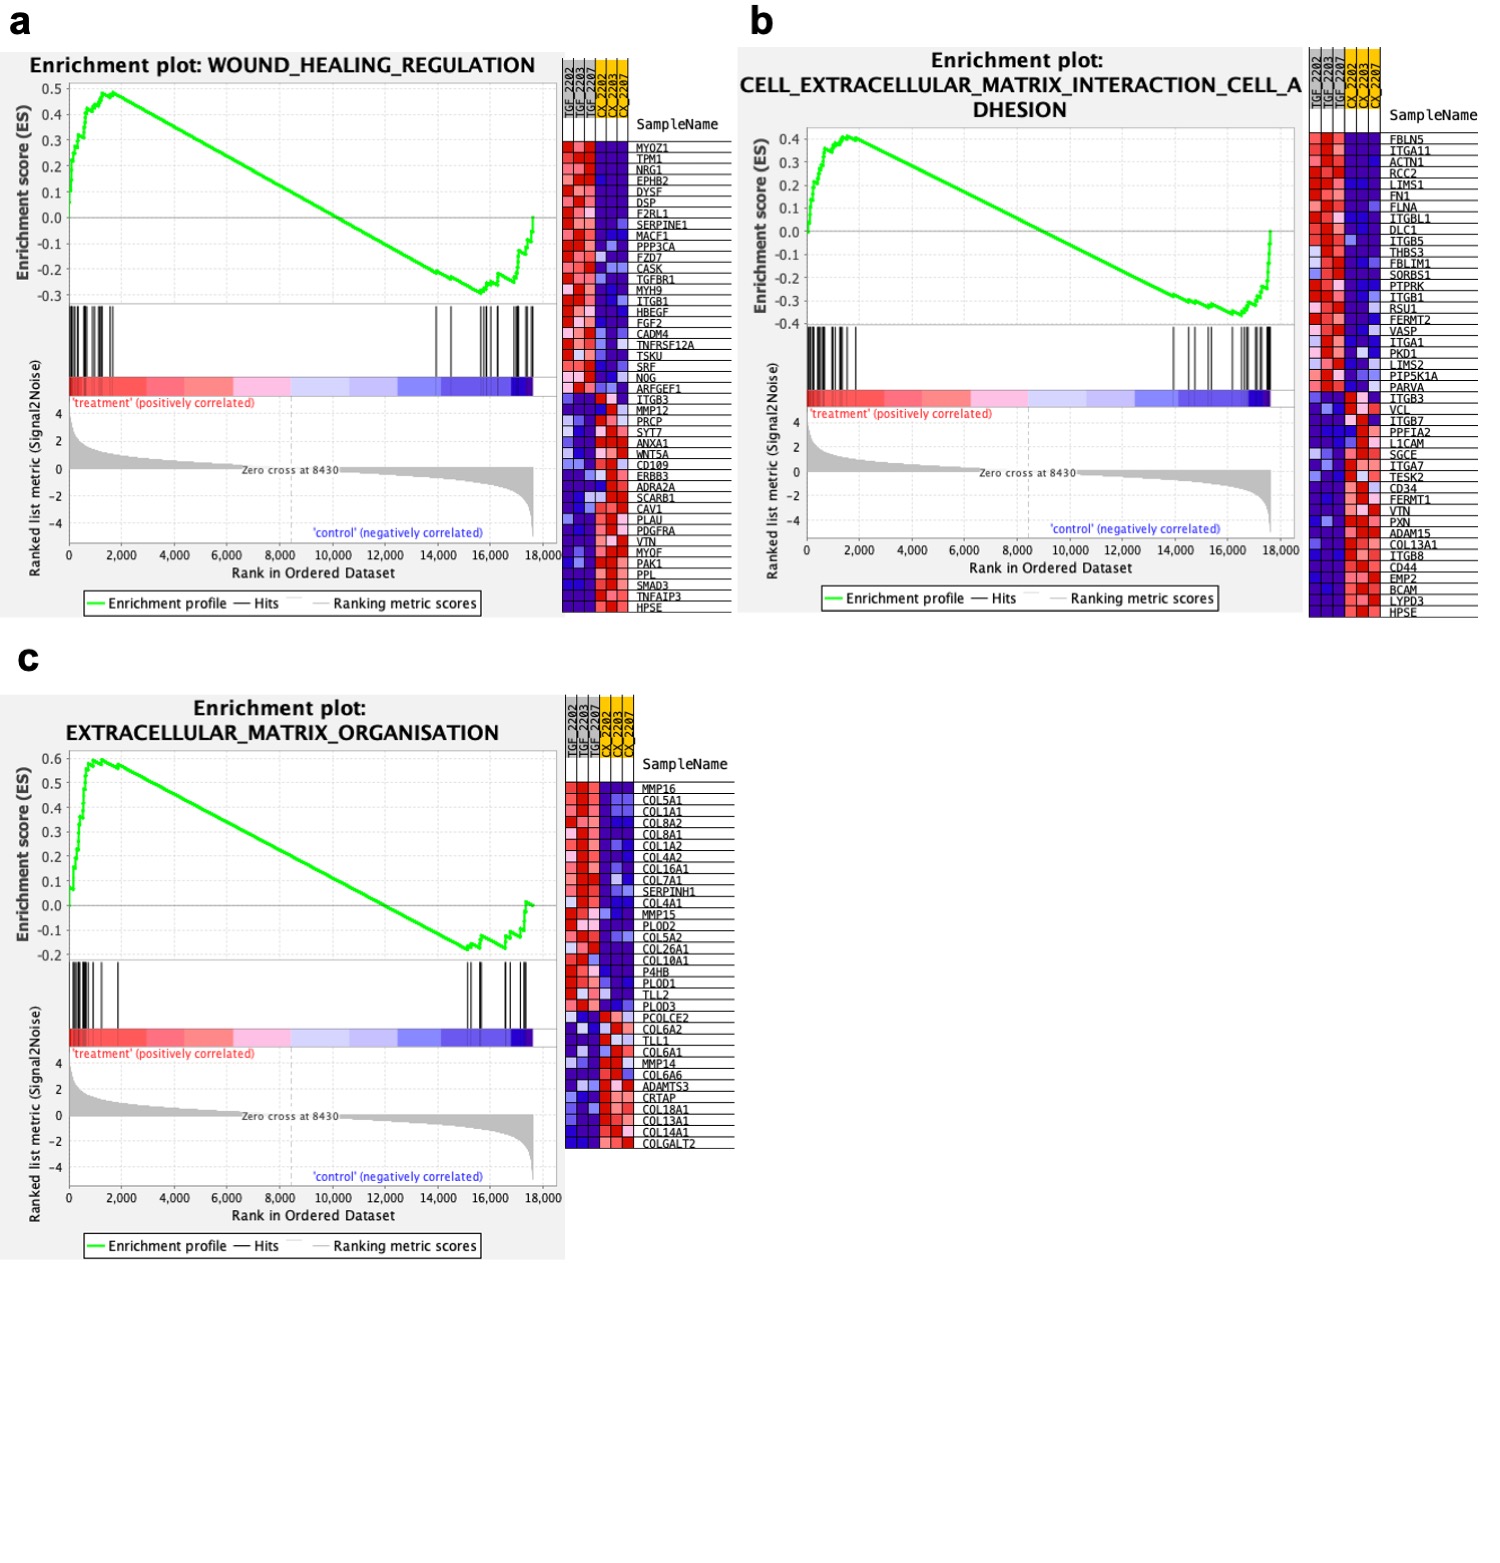
**Supplementary figure 3: GSEA for TGF-B treatment versus control (a)** GSEA plot of wound healing regulation with GSEA standard hallmark gene set with heatmap of gene expression red = upregulated, and blue = downregulated. The enrichment score (ES) is indicated. **(b)** GSEA plot for cell extracellular matrix interaction cell adhesion using GSEA standard hallmark gene set. **(c)** GSEA plot for extracellular matrix organization using GSEA standard hallmark gene set.
